# Supplementary material for: Pharmacokinetics and Metabolomic Profiling of Metformin and Andrographis paniculata: A Protocol for a Crossover Randomised Controlled Trial
Source: J Clin Med. 2022 Jul 6;11(14):3931. doi: 10.3390/jcm11143931 (PMC9323336; doi:10.3390/jcm11143931)
Supplement: Supplementary file 1 [file jcm-11-03931-s001.zip]

Archive with 4 entries (4 files):
- Document S1. Clinical Trial Protocol P1-PKPD-Metabolomics V4.0 170919.pdf
- Document S2. P1-PKPD-Metabolomic ICF-English V2.0 160719.pdf
- Document S3. P1-PKPD-Metabolomic PIS-English V2.0 160719.pdf
- jcm-1697297-supplementary.pdf
